# Supplementary material for: Development and Optimization of a Miniaturized Western Blot-Based Screening Platform to Identify Regulators of Post-Translational Modifications
Source: High Throughput. 2019 Jun 3;8(2):15. doi: 10.3390/ht8020015 (PMC6631403; doi:10.3390/ht8020015)
Supplement: Supplementary file 1 [file high-throughput-08-00015-s001.pdf]

# Supplementary Materials: Development and optimization of a miniaturized western blot-based screening platform to identify regulators of post-translational modifications

Florencia Villafañez, Vanesa Gottifredi and Gastón Soria

**A**

## Experimental pipeline of In-Cell Western Blot (ICW)

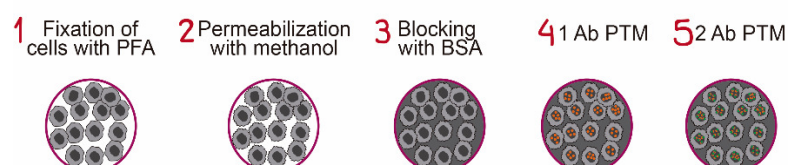

**B**

## Detection of ubi-PCNA by ICW

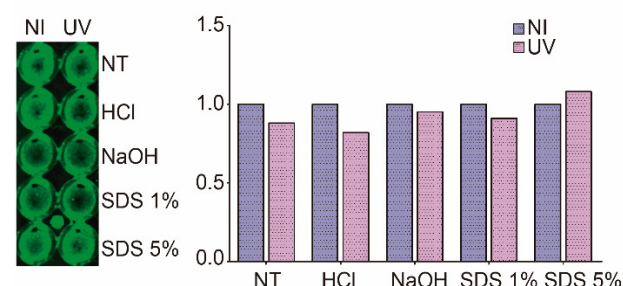

**C**

## Analysis of primary antibodies specificity

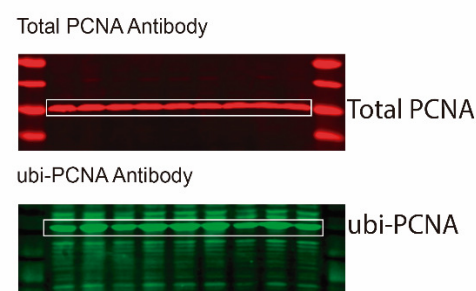

**Figure S1.** Experimental analysis of technique IC-WB for screening purposes. (A) General experimental pipeline for technique IC-WB; (B) Representative image depicting the detection of ubi-PCNA by IC-WB and quantification of fold induction; (C) Representative image of a WB to assess specificity of primary antibodies used in IC-WB. .
